# Supplementary material
Source: publisher figshare collection journal article supplement (https://acs.figshare.com/ndownloader/files/4049077)
Supplement: Supplementary file 1 [file 4049077]

 
data_lido-oxa
 
_audit_creation_method            SHELXL-97
_chemical_name_systematic
;
 ?
;
_chemical_name_common             ?
_chemical_melting_point           ?
_chemical_formula_moiety          ?
_chemical_formula_sum
 'C16 H24 N2 O5'
_chemical_formula_weight          324.37
 
loop_
 _atom_type_symbol
 _atom_type_description
 _atom_type_scat_dispersion_real
 _atom_type_scat_dispersion_imag
 _atom_type_scat_source
 'C'  'C'   0.0033   0.0016
 'International Tables Vol C Tables 4.2.6.8 and 6.1.1.4'
 'H'  'H'   0.0000   0.0000
 'International Tables Vol C Tables 4.2.6.8 and 6.1.1.4'
 'O'  'O'   0.0106   0.0060
 'International Tables Vol C Tables 4.2.6.8 and 6.1.1.4'
 'N'  'N'   0.0061   0.0033
 'International Tables Vol C Tables 4.2.6.8 and 6.1.1.4'
 
_symmetry_cell_setting            Monoclinic
_symmetry_space_group_name_H-M    P21/c
 
loop_
 _symmetry_equiv_pos_as_xyz
 'x, y, z'
 '-x, y+1/2, -z+1/2'
 '-x, -y, -z'
 'x, -y-1/2, z-1/2'
 
_cell_length_a                    10.5817(8)
_cell_length_b                    10.3447(5)
_cell_length_c                    15.3496(11)
_cell_angle_alpha                 90.00
_cell_angle_beta                  102.719(7)
_cell_angle_gamma                 90.00
_cell_volume                      1639.01(19)
_cell_formula_units_Z             4
_cell_measurement_temperature     293(2)
_cell_measurement_reflns_used     ?
_cell_measurement_theta_min       ?
_cell_measurement_theta_max       ?
 
_exptl_crystal_description        Prism
_exptl_crystal_colour             Colorless
_exptl_crystal_size_max           0.5
_exptl_crystal_size_mid           0.4
_exptl_crystal_size_min           0.3
_exptl_crystal_density_meas       ?
_exptl_crystal_density_diffrn     1.315
_exptl_crystal_density_method     'not measured'
_exptl_crystal_F_000              696
_exptl_absorpt_coefficient_mu     0.098
_exptl_absorpt_correction_type    none
_exptl_absorpt_correction_T_min   ?
_exptl_absorpt_correction_T_max   ?
_exptl_absorpt_process_details    ?
 
_exptl_special_details
;
 ?
;
 
_diffrn_ambient_temperature       293(2)
_diffrn_radiation_wavelength      0.71073
_diffrn_radiation_type            MoK\a
_diffrn_radiation_source          'fine-focus sealed tube'
_diffrn_radiation_monochromator   graphite
_diffrn_measurement_device_type   ?
_diffrn_measurement_method        ?
_diffrn_detector_area_resol_mean  ?
_diffrn_standards_number          ?
_diffrn_standards_interval_count  ?
_diffrn_standards_interval_time   ?
_diffrn_standards_decay_%         ?
_diffrn_reflns_number             7219
_diffrn_reflns_av_R_equivalents   0.0345
_diffrn_reflns_av_sigmaI/netI     0.0744
_diffrn_reflns_limit_h_min        -14
_diffrn_reflns_limit_h_max        6
_diffrn_reflns_limit_k_min        -12
_diffrn_reflns_limit_k_max        12
_diffrn_reflns_limit_l_min        -17
_diffrn_reflns_limit_l_max        20
_diffrn_reflns_theta_min          2.72
_diffrn_reflns_theta_max          29.22
_reflns_number_total              3744
_reflns_number_gt                 2476
_reflns_threshold_expression      >2sigma(I)
 
_computing_data_collection        ?
_computing_cell_refinement        ?
_computing_data_reduction         ?
_computing_structure_solution     ?
_computing_structure_refinement   'SHELXL-97 (Sheldrick, 1997)'
_computing_molecular_graphics     ?
_computing_publication_material   ?
 
_refine_special_details
;
 Refinement of F^2^ against ALL reflections.  The weighted R-factor wR and
 goodness of fit S are based on F^2^, conventional R-factors R are based
 on F, with F set to zero for negative F^2^. The threshold expression of
 F^2^ > 2sigma(F^2^) is used only for calculating R-factors(gt) etc. and is
 not relevant to the choice of reflections for refinement.  R-factors based
 on F^2^ are statistically about twice as large as those based on F, and R-
 factors based on ALL data will be even larger.
;
 
_refine_ls_structure_factor_coef  Fsqd
_refine_ls_matrix_type            full
_refine_ls_weighting_scheme       calc
_refine_ls_weighting_details
 'calc w=1/[\s^2^(Fo^2^)+(0.0569P)^2^+0.0305P] where P=(Fo^2^+2Fc^2^)/3'
_atom_sites_solution_primary      direct
_atom_sites_solution_secondary    difmap
_atom_sites_solution_hydrogens    geom
_refine_ls_hydrogen_treatment     mixed
_refine_ls_extinction_method      none
_refine_ls_extinction_coef        ?
_refine_ls_number_reflns          3744
_refine_ls_number_parameters      226
_refine_ls_number_restraints      0
_refine_ls_R_factor_all           0.1286
_refine_ls_R_factor_gt            0.0791
_refine_ls_wR_factor_ref          0.1561
_refine_ls_wR_factor_gt           0.1366
_refine_ls_goodness_of_fit_ref    1.115
_refine_ls_restrained_S_all       1.115
_refine_ls_shift/su_max           0.051
_refine_ls_shift/su_mean          0.004
 
loop_
 _atom_site_label
 _atom_site_type_symbol
 _atom_site_fract_x
 _atom_site_fract_y
 _atom_site_fract_z
 _atom_site_U_iso_or_equiv
 _atom_site_adp_type
 _atom_site_occupancy
 _atom_site_symmetry_multiplicity
 _atom_site_calc_flag
 _atom_site_refinement_flags
 _atom_site_disorder_assembly
 _atom_site_disorder_group
O O 0.81114(18) 0.30049(15) 0.11541(11) 0.0392(5) Uani 1 1 d . . .
O0AA O 0.91142(17) 0.69059(15) 0.29358(12) 0.0401(5) Uani 1 1 d . . .
N N 1.12356(19) 0.53664(18) 0.31513(13) 0.0256(5) Uani 1 1 d . . .
N0AA N 0.7731(2) 0.53691(18) 0.22216(13) 0.0311(5) Uani 1 1 d . . .
H0AA H 0.7675 0.4593 0.2016 0.037 Uiso 1 1 calc R . .
O1AA O 0.92557(19) 0.45531(16) 0.06683(11) 0.0438(5) Uani 1 1 d . . .
O2AA O 1.0113(2) 0.29462(16) -0.04098(12) 0.0477(5) Uani 1 1 d . . .
H2AA H 1.0182 0.3729 -0.0330 0.072 Uiso 1 1 calc R . .
O3AA O 0.8996(2) 0.13494(18) -0.00035(14) 0.0623(7) Uani 1 1 d . . .
C C 0.8896(2) 0.5799(2) 0.26705(15) 0.0281(6) Uani 1 1 d . . .
C0AA C 0.6589(2) 0.6145(2) 0.20721(17) 0.0320(6) Uani 1 1 d . . .
C1AA C 1.2176(3) 0.4470(2) 0.37265(17) 0.0354(6) Uani 1 1 d . . .
H1AA H 1.2287 0.3706 0.3384 0.042 Uiso 1 1 calc R . .
H1AB H 1.1825 0.4197 0.4230 0.042 Uiso 1 1 calc R . .
C2AA C 0.8844(3) 0.3432(2) 0.06868(15) 0.0306(6) Uani 1 1 d . . .
C3AA C 0.9927(2) 0.4769(2) 0.29064(16) 0.0292(6) Uani 1 1 d . . .
H3AB H 0.9774 0.4260 0.3404 0.035 Uiso 1 1 calc R . .
H3AA H 0.9883 0.4196 0.2401 0.035 Uiso 1 1 calc R . .
C4AA C 0.6141(3) 0.6625(2) 0.28052(19) 0.0389(7) Uani 1 1 d . . .
C5AA C 0.9314(3) 0.2466(3) 0.00631(16) 0.0375(7) Uani 1 1 d . . .
C6AA C 1.1692(3) 0.5881(2) 0.23520(16) 0.0327(6) Uani 1 1 d . . .
H6AA H 1.0972 0.6313 0.1960 0.039 Uiso 1 1 calc R . .
H6AB H 1.2360 0.6522 0.2556 0.039 Uiso 1 1 calc R . .
C7AA C 0.5926(3) 0.6394(2) 0.11958(18) 0.0374(7) Uani 1 1 d . . .
C8AA C 0.5033(3) 0.7390(3) 0.2630(2) 0.0498(8) Uani 1 1 d . . .
C9AA C 0.6433(3) 0.5908(3) 0.04128(18) 0.0550(8) Uani 1 1 d . . .
H9AA H 0.6466 0.4980 0.0427 0.082 Uiso 1 1 calc R . .
H9AC H 0.7288 0.6245 0.0446 0.082 Uiso 1 1 calc R . .
H9AB H 0.5870 0.6187 -0.0133 0.082 Uiso 1 1 calc R . .
C0BA C 1.2221(3) 0.4870(3) 0.18207(17) 0.0438(7) Uani 1 1 d . . .
H0BB H 1.2360 0.5247 0.1278 0.066 Uiso 1 1 calc R . .
H0BA H 1.1613 0.4172 0.1680 0.066 Uiso 1 1 calc R . .
H0BC H 1.3028 0.4547 0.2166 0.066 Uiso 1 1 calc R . .
C1BA C 1.3478(3) 0.5099(3) 0.40684(19) 0.0486(8) Uani 1 1 d . . .
H1BA H 1.3889 0.5249 0.3579 0.073 Uiso 1 1 calc R . .
H1BC H 1.4012 0.4540 0.4497 0.073 Uiso 1 1 calc R . .
H1BB H 1.3361 0.5908 0.4347 0.073 Uiso 1 1 calc R . .
C2BA C 0.6805(3) 0.6336(3) 0.37502(18) 0.0504(8) Uani 1 1 d . . .
H2BA H 0.7076 0.5448 0.3797 0.076 Uiso 1 1 calc R . .
H2BB H 0.6217 0.6487 0.4135 0.076 Uiso 1 1 calc R . .
H2BC H 0.7548 0.6886 0.3925 0.076 Uiso 1 1 calc R . .
C3BA C 0.4375(3) 0.7635(3) 0.1778(3) 0.0569(9) Uani 1 1 d . . .
C4BA C 0.4800(3) 0.7130(3) 0.1067(2) 0.0511(8) Uani 1 1 d . . .
H8AA H 0.475(3) 0.774(3) 0.3139(18) 0.061 Uiso 1 1 d . . .
H3BA H 0.359(3) 0.812(3) 0.1652(18) 0.061 Uiso 1 1 d . . .
H4BA H 0.440(3) 0.731(3) 0.0476(19) 0.061 Uiso 1 1 d . . .
H H 1.120(3) 0.609(2) 0.3508(16) 0.044(8) Uiso 1 1 d . . .
 
loop_
 _atom_site_aniso_label
 _atom_site_aniso_U_11
 _atom_site_aniso_U_22
 _atom_site_aniso_U_33
 _atom_site_aniso_U_23
 _atom_site_aniso_U_13
 _atom_site_aniso_U_12
O 0.0449(12) 0.0373(10) 0.0384(10) 0.0045(8) 0.0158(9) -0.0055(9)
O0AA 0.0289(11) 0.0280(9) 0.0615(12) -0.0097(8) 0.0056(9) -0.0019(8)
N 0.0243(12) 0.0245(10) 0.0267(11) -0.0012(9) 0.0027(9) 0.0018(9)
N0AA 0.0270(12) 0.0256(10) 0.0386(12) -0.0025(9) 0.0027(10) -0.0004(9)
O1AA 0.0572(14) 0.0323(10) 0.0480(12) -0.0016(8) 0.0248(10) -0.0085(9)
O2AA 0.0677(15) 0.0361(10) 0.0479(12) -0.0007(9) 0.0309(11) 0.0021(10)
O3AA 0.097(2) 0.0330(11) 0.0671(14) -0.0078(10) 0.0390(14) -0.0103(12)
C 0.0277(14) 0.0294(13) 0.0282(13) 0.0014(10) 0.0084(11) -0.0005(11)
C0AA 0.0242(14) 0.0246(12) 0.0472(16) 0.0043(11) 0.0076(12) -0.0032(11)
C1AA 0.0356(16) 0.0349(14) 0.0341(14) 0.0035(11) 0.0043(12) 0.0101(12)
C2AA 0.0337(15) 0.0312(14) 0.0249(13) 0.0049(11) 0.0017(11) 0.0008(12)
C3AA 0.0295(14) 0.0242(12) 0.0335(13) 0.0018(10) 0.0062(11) -0.0019(10)
C4AA 0.0291(16) 0.0335(14) 0.0559(18) -0.0022(13) 0.0135(14) -0.0072(12)
C5AA 0.0489(19) 0.0340(15) 0.0288(14) 0.0040(12) 0.0066(13) 0.0014(13)
C6AA 0.0343(15) 0.0308(13) 0.0341(14) 0.0036(11) 0.0099(12) 0.0013(11)
C7AA 0.0297(16) 0.0328(14) 0.0481(17) 0.0103(12) 0.0048(13) -0.0048(12)
C8AA 0.0357(18) 0.0414(17) 0.077(2) -0.0026(16) 0.0223(17) -0.0015(14)
C9AA 0.044(2) 0.073(2) 0.0426(17) 0.0092(15) -0.0012(14) -0.0035(17)
C0BA 0.0469(19) 0.0468(16) 0.0409(16) -0.0052(13) 0.0167(14) -0.0035(14)
C1BA 0.0349(18) 0.0535(18) 0.0507(18) -0.0013(14) -0.0056(14) 0.0080(14)
C2BA 0.047(2) 0.0614(19) 0.0461(18) -0.0070(15) 0.0179(15) -0.0006(16)
C3BA 0.0306(18) 0.0374(17) 0.105(3) 0.0134(18) 0.0197(19) 0.0070(14)
C4BA 0.0358(18) 0.0427(17) 0.068(2) 0.0195(16) -0.0034(16) -0.0037(14)
 
_geom_special_details
;
 All esds (except the esd in the dihedral angle between two l.s. planes)
 are estimated using the full covariance matrix.  The cell esds are taken
 into account individually in the estimation of esds in distances, angles
 and torsion angles; correlations between esds in cell parameters are only
 used when they are defined by crystal symmetry.  An approximate (isotropic)
 treatment of cell esds is used for estimating esds involving l.s. planes.
;
 
loop_
 _geom_bond_atom_site_label_1
 _geom_bond_atom_site_label_2
 _geom_bond_distance
 _geom_bond_site_symmetry_2
 _geom_bond_publ_flag
O C2AA 1.247(3) . ?
O0AA C 1.220(3) . ?
N C3AA 1.487(3) . ?
N C1AA 1.497(3) . ?
N C6AA 1.511(3) . ?
N0AA C 1.348(3) . ?
N0AA C0AA 1.427(3) . ?
O1AA C2AA 1.242(3) . ?
O2AA C5AA 1.326(3) . ?
O3AA C5AA 1.201(3) . ?
C C3AA 1.510(3) . ?
C0AA C7AA 1.397(3) . ?
C0AA C4AA 1.404(4) . ?
C1AA C1BA 1.510(4) . ?
C2AA C5AA 1.540(4) . ?
C4AA C8AA 1.391(4) . ?
C4AA C2BA 1.496(4) . ?
C6AA C0BA 1.508(3) . ?
C7AA C4BA 1.390(4) . ?
C7AA C9AA 1.507(4) . ?
C8AA C3BA 1.363(4) . ?
C3BA C4BA 1.372(4) . ?
 
loop_
 _geom_angle_atom_site_label_1
 _geom_angle_atom_site_label_2
 _geom_angle_atom_site_label_3
 _geom_angle
 _geom_angle_site_symmetry_1
 _geom_angle_site_symmetry_3
 _geom_angle_publ_flag
C3AA N C1AA 110.65(18) . . ?
C3AA N C6AA 112.78(18) . . ?
C1AA N C6AA 114.04(19) . . ?
C N0AA C0AA 122.9(2) . . ?
O0AA C N0AA 124.4(2) . . ?
O0AA C C3AA 120.5(2) . . ?
N0AA C C3AA 114.9(2) . . ?
C7AA C0AA C4AA 121.3(2) . . ?
C7AA C0AA N0AA 119.1(2) . . ?
C4AA C0AA N0AA 119.6(2) . . ?
N C1AA C1BA 112.0(2) . . ?
O1AA C2AA O 127.6(2) . . ?
O1AA C2AA C5AA 115.4(2) . . ?
O C2AA C5AA 117.0(2) . . ?
N C3AA C 110.56(18) . . ?
C8AA C4AA C0AA 117.7(3) . . ?
C8AA C4AA C2BA 119.8(3) . . ?
C0AA C4AA C2BA 122.5(3) . . ?
O3AA C5AA O2AA 120.9(2) . . ?
O3AA C5AA C2AA 123.6(3) . . ?
O2AA C5AA C2AA 115.4(2) . . ?
C0BA C6AA N 114.73(19) . . ?
C4BA C7AA C0AA 118.1(3) . . ?
C4BA C7AA C9AA 120.9(3) . . ?
C0AA C7AA C9AA 121.0(3) . . ?
C3BA C8AA C4AA 121.5(3) . . ?
C8AA C3BA C4BA 120.3(3) . . ?
C3BA C4BA C7AA 121.1(3) . . ?
 
_diffrn_measured_fraction_theta_max    0.841
_diffrn_reflns_theta_full              25.00
_diffrn_measured_fraction_theta_full   0.999
_refine_diff_density_max    0.227
_refine_diff_density_min   -0.208
_refine_diff_density_rms    0.044
